# Supplementary material
Source: Springer Nature journal article supplement (https://www.springermedizin.de/resource/supplementary/12943_2011_899_MOESM14_ESM.pdf/9551956)

**A**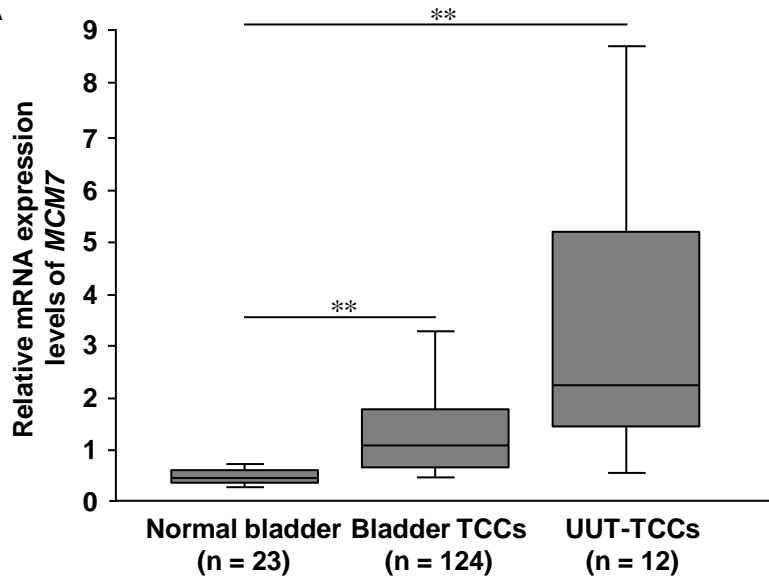**B**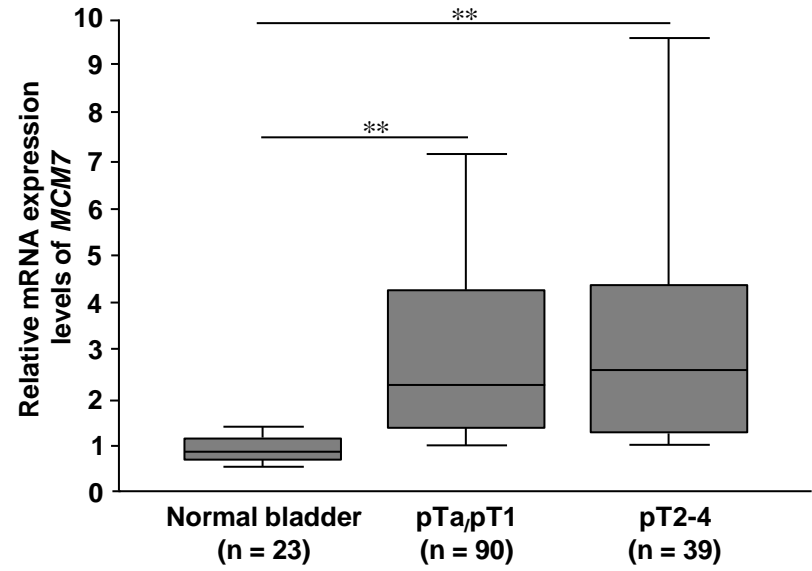**C**

### Transitional cell carcinoma

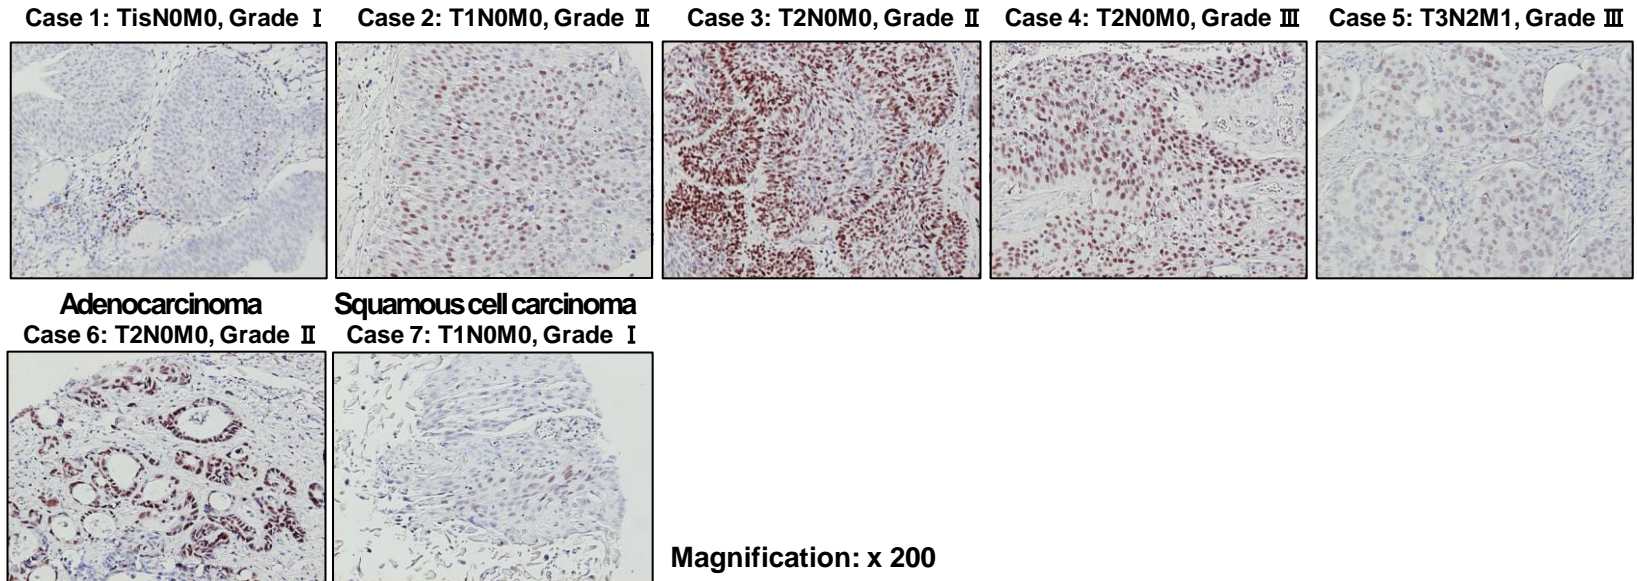

Supplement: MOESM14 [file 9551956]
